# Supplementary material for: Hydroxypropyl Methylcellulose-Based Nasal Sprays Effectively Inhibit In Vitro SARS-CoV-2 Infection and Spread
Source: MDPI journal article supplement (doi:10.3390/v13122345), 2021-11-23
Supplement: s1 [file s1]

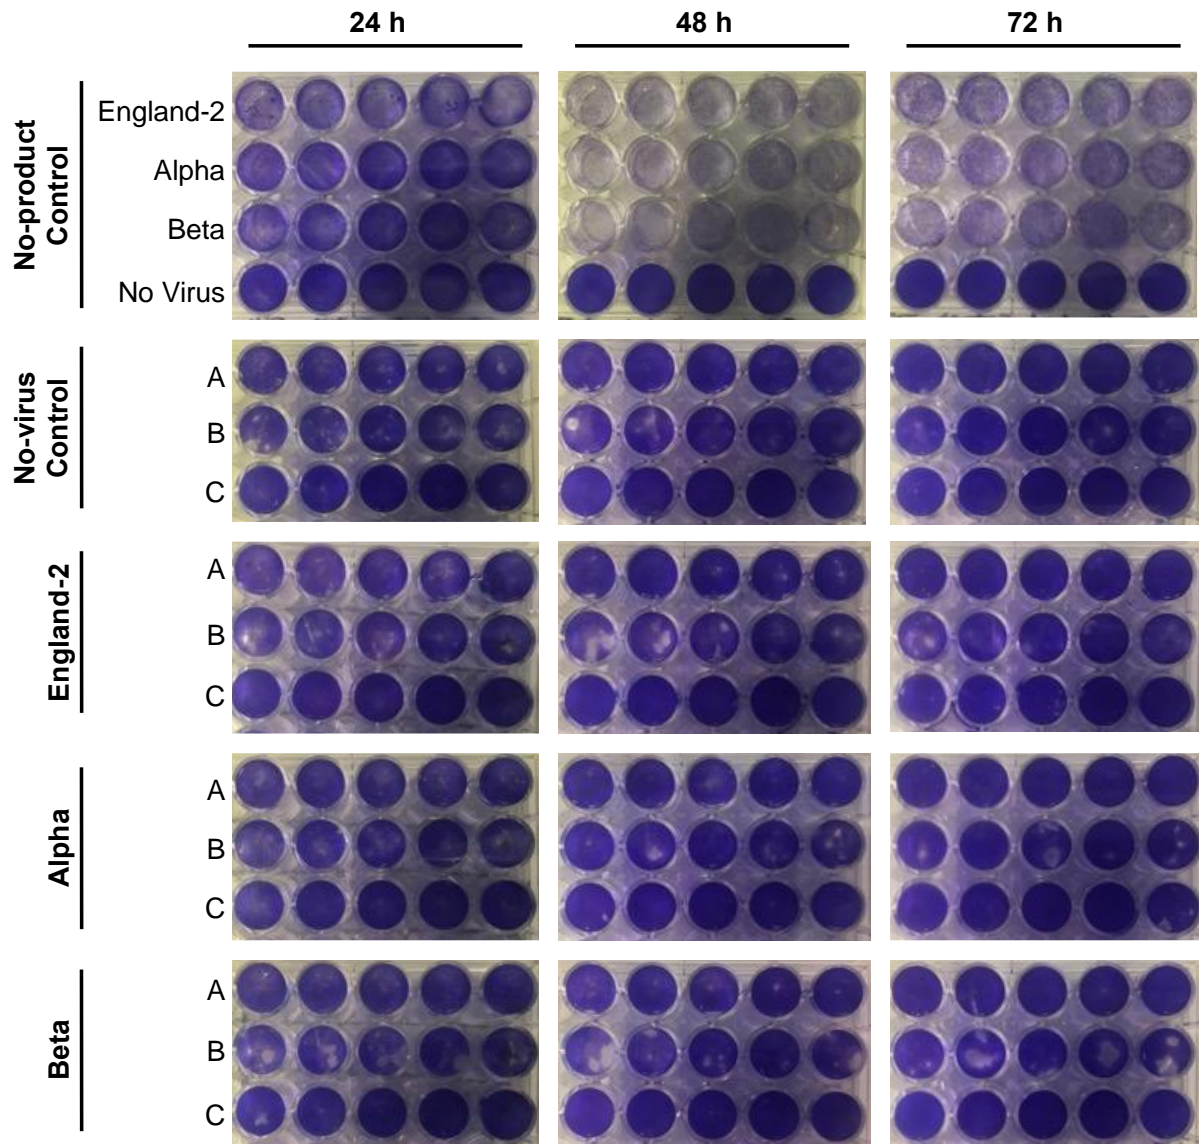

**Figure S1.** Plate images of inhibition of infection. Cell monolayer survival was used as a proxy measure for infection. Following pre-treatment with product A, B, or C, and SARS-CoV-2 infection of Vero A/T cells in 24-well plates, cells were fixed with methanol and stained with crystal violet. The plate images show the degree of monolayer staining, under each of the conditions tested, from one representative experiment.

**Table S1:** Statistical analysis for Figure 1

| Test            | MOI  | Product | Timepoint | P value | Significance |
|-----------------|------|---------|-----------|---------|--------------|
| No-product vs A | 0.01 | 1g      | 24h       | <0.0001 | ****         |
|                 |      |         | 48h       | <0.0001 | ****         |
|                 |      |         | 72h       | 0.0052  | **           |
|                 |      | 3g      | 24h       | 0.0003  | ***          |
|                 |      |         | 48h       | <0.0001 | ****         |
|                 |      |         | 72h       | <0.0001 | ****         |
|                 |      | 6.4g    | 24h       | <0.0001 | ****         |
|                 |      |         | 48h       | 0.0004  | ***          |
|                 |      |         | 72h       | 0.0005  | ***          |
|                 | 1    | 1g      | 24h       | <0.0001 | ****         |
|                 |      |         | 48h       | 0.0007  | ***          |
|                 |      |         | 72h       | 0.0074  | **           |
|                 |      | 3g      | 24h       | <0.0001 | ****         |
|                 |      |         | 48h       | <0.0001 | ****         |
|                 |      |         | 72h       | <0.0001 | ****         |
|                 |      | 6.4g    | 24h       | 0.0002  | ***          |
|                 |      |         | 48h       | <0.0001 | ****         |
|                 |      |         | 72h       | <0.0001 | ****         |
| No-product vs B | 0.01 | 1g      | 24h       | <0.0001 | ****         |
|                 |      |         | 48h       | 0.0012  | **           |
|                 |      |         | 72h       | 0.0011  | **           |
|                 |      | 3g      | 24h       | <0.0001 | ****         |
|                 |      |         | 48h       | <0.0001 | ****         |
|                 |      |         | 72h       | <0.0001 | ****         |
|                 |      | 6.4g    | 24h       | <0.0001 | ****         |
|                 |      |         | 48h       | 0.0004  | ***          |
|                 |      |         | 72h       | 0.0005  | ***          |
|                 | 1    | 1g      | 24h       | <0.0001 | ****         |
|                 |      |         | 48h       | 0.0005  | ***          |
|                 |      |         | 72h       | <0.0001 | ****         |
|                 |      | 3g      | 24h       | <0.0001 | ****         |
|                 |      |         | 48h       | 0.0002  | ***          |
|                 |      |         | 72h       | <0.0001 | ****         |
|                 |      | 6.4g    | 24h       | <0.0001 | ****         |
|                 |      |         | 48h       | <0.0001 | ****         |
|                 |      |         | 72h       | <0.0001 | ****         |
| No-product vs C | 0.01 | 1g      | 24h       | <0.0001 | ****         |
|                 |      |         | 48h       | 0.0022  | **           |
|                 |      |         | 72h       | 0.0069  | **           |
|                 |      | 3g      | 24h       | <0.0001 | ****         |
|                 |      |         | 48h       | <0.0001 | ****         |
|                 |      |         | 72h       | <0.0001 | ****         |
|                 |      | 6.4g    | 24h       | <0.0001 | ****         |
|                 |      |         | 48h       | 0.0004  | ***          |
|                 |      |         | 72h       | 0.0005  | ***          |
|                 | 1    | 1g      | 24h       | <0.0001 | ****         |
|                 |      |         | 48h       | 0.0033  | **           |
|                 |      |         | 72h       | 0.0052  | **           |
|                 |      | 3g      | 24h       | <0.0001 | ****         |
|                 |      |         | 48h       | 0.0101  | *            |
|                 |      |         | 72h       | 0.0173  | *            |
|                 |      | 6.4g    | 24h       | <0.0001 | ****         |
|                 |      |         | 48h       | <0.0001 | ****         |
|                 |      |         | 72h       | <0.0001 | ****         |

**Table S2:** Statistical analysis for Figure 2

| <b>Virus Strain</b> | <b>Product</b> | <b>Timepoint</b> | <b><i>P</i> value</b> | <b>Significance</b> |
|---------------------|----------------|------------------|-----------------------|---------------------|
| <b>England-2</b>    | <b>A</b>       | 24h              | 0.4119                | ns                  |
|                     |                | 48h              | <0.0001               | ****                |
|                     |                | 72h              | <0.0001               | ****                |
|                     | <b>B</b>       | 24h              | 0.0415                | *                   |
|                     |                | 48h              | <0.0001               | ****                |
|                     |                | 72h              | <0.0001               | ****                |
|                     | <b>C</b>       | 24h              | 0.1145                | ns                  |
|                     |                | 48h              | <0.0001               | ****                |
|                     |                | 72h              | <0.0001               | ****                |
| <b>Alpha</b>        | <b>A</b>       | 24h              | 0.0804                | ns                  |
|                     |                | 48h              | <0.0001               | ****                |
|                     |                | 72h              | <0.0001               | ****                |
|                     | <b>B</b>       | 24h              | 0.0368                | *                   |
|                     |                | 48h              | <0.0001               | ****                |
|                     |                | 72h              | <0.0001               | ****                |
|                     | <b>C</b>       | 24h              | 0.2315                | ns                  |
|                     |                | 48h              | <0.0001               | ****                |
|                     |                | 72h              | <0.0001               | ****                |
| <b>Beta</b>         | <b>A</b>       | 24h              | 0.0830                | ns                  |
|                     |                | 48h              | 0.0001                | ***                 |
|                     |                | 72h              | <0.0001               | ****                |
|                     | <b>B</b>       | 24h              | 0.0600                | ns                  |
|                     |                | 48h              | <0.0001               | ****                |
|                     |                | 72h              | <0.0001               | ****                |
|                     | <b>C</b>       | 24h              | 0.0944                | ns                  |
|                     |                | 48h              | 0.0002                | ***                 |
|                     |                | 72h              | <0.0001               | ****                |
